# Supplementary material
Source: Springer Nature journal article supplement (https://www.springerprofessional.de/resource/supplementary/13173_2013_12_MOESM1_ESM.pdf/11897014)



Abstraction  
and  
complexity

Pragmatic / Discourse

Semantic

Syntax

Morphology

Supplement: MOESM1 [file 11897014]
